# Supplementary material for: ME1 Regulates NADPH Homeostasis to Promote Gastric Cancer Growth and Metastasis
Source: Oxford University Press journal article supplement (doi:10.1158/0008-5472.can-17-3155), 2018-04-12
Supplement: 00085472can173155-sup-190806_2_supp_4487830_p22tl6.docx [file 00085472can173155-sup-190806_2_supp_4487830_p22tl6.docx]

**Table S1. Primers sequence for qPCR**

| Gene | Sequence (5'-3') |
| --- | --- |
| ME1-F | GAGTGCTGACATCTGACATTGA |
| ME1-R | TTGGCTTCCGAAACACCAAAC |
| ME2-F | ATGTTGTCCCGGTTAAGAGTAGT |
| ME2-R | ACCAAGCATTTGTCGTTCTTGT |
| SMAD4 -F | CTCATGTGATCTATGCCCGTC |
| SAMD4 -R | AGGTGATACAACTCGTTCGTAGT |
| ETV4-F | TGGAGAGCAGTGCCTTTACTC |
| ETV4-R | TTGATGGCGATTTGTCTGGGG |
| β-Actin -F | CATGTACGTTGCTATCCAGGC |
| β-Actin -R | CTCCTTAATGTCACGCACGAT |

**Table S2.** The correlation between clinicopathological parameters and ME1 expression

|  | ME1 expression | | *P* |
| --- | --- | --- | --- |
| Low, n(%) | High, n(%) |
| Age |  |  |  |
| ﹤60 | 59(43.7) | 76(56.3) | 0.771 |
| ≥60 | 33(45.8) | 39(54.2) |  |
| Gender |  |  |  |
| Male | 62(45.6) | 74(54.4) | 0.662 |
| Female | 30(42.3) | 41(57.7) |  |
| Tumor size |  |  |  |
| ﹤5cm | 61(50.0) | 61(50.0) | 0.065 |
| ≥5cm | 31(36.5) | 54(63.5) |  |
| Differentiation status |  |  |  |
| Well or Moderate | 15(31.3) | 33(68.8) | 0.046* |
| Poor and others | 77(48.4) | 82(51.6) |  |
| Lymph node invasion |  |  | 0.877 |
| Absent | 65(43.9) | 83(56.1) |  |
| Present | 27(45.8) | 32(54.2) |  |
| Venous invasion |  |  | 1.000 |
| Absent | 45(44.6) | 56(55.4) |  |
| Present | 47(44.3) | 59(55.7) |  |
| Perineural invasion |  |  | 0.287 |
| Absent | 24(38.1) | 39(61.9) |  |
| Present | 68(47.2) | 76(52.8) |  |
| TNM stage |  |  | 0.472 |
| I-II | 54(42.2) | 74(57.8) |  |
| III-IV | 38(48.1) | 41(51.9) |  |

**P* < 0.05.

**Table S3.** Univariate and multivariate analyses of various potential prognostic factors in GC patients

|  | Univariate analysis | | Multivariate analysis | | | |
| --- | --- | --- | --- | --- | --- | --- |
| HR (95% CI) | *P* | HR (95% CI) | *P* | | |
| Age (<60/≥60) | 1.12(0.69-1.80) | 0.652 | - | | - | |
| Gender (male/female) | 1.05(0.65-1.69) | 0.838 | - | | - | |
| Differentiation  (well, moderate/poor) | 1.42(0.79-2.54) | 0.237 | - | | - | |
| Tumor size (≥5cm/<5cm) | 1.31(0.83-2.06) | 0.249 | - | | - | |
| Lymph node invasion (present/absent)  Venous invasion  (present/absent)  Perineural invasion (present/absent) | 1.30(0.80-2.10)  2.12(1.30 -3.47)  2.20(1.21-4.00) | 0.288  0.003*  0.010* | -  1.29(0.77-2.17)  1.41(0.75-2.66) | | -  0.334  0.290 |
| TNM Stage(III-IV/I-II) | 3.97(2.47-6.39) | 0.000* | 3.80(2.24-6.44) | | 0.000* | |
| ME1 protein (high/low) | 2.15(1.33-3.48) | 0.002* | 2.65(1.63-4.31) | | 0.000* | |

HR: hazard ratio; CI: confidence interval; **P* < 0.05.
